# Supplementary material
Source: PubMed Central journal article supplement (PMC4071931)
Supplement: NIHMS284214-supplement-01.pdf [file NIHMS284214-supplement-01.pdf]

**SUPPLEMENTAL MATERIAL**

**Table A: Myocardial Matrix Biomarker Profiles in Referent Control Subjects, Subjects with Left Ventricular Hypertrophy, and Subjects with Diastolic Heart Failure**

|                                        | Patient Grouping                  |                                               |                                                   | F ( $\chi^2$ ) | p-Value |
|----------------------------------------|-----------------------------------|-----------------------------------------------|---------------------------------------------------|----------------|---------|
|                                        | Referent Control                  | LVH                                           | DHF                                               |                |         |
| MMP-1, ng/mL                           | 0.78 ± 0.06<br>0.55[0.26,1.05]    | 0.89 ± 0.07<br>0.72[0.37,1.22]                | 0.94 ± 0.17<br>0.67[0.38,1.29]                    | 1.1            | 0.325   |
| MMP-2, ng/mL                           | 339.7 ± 9.3<br>328.1[216.4,436.4] | 326.4 ± 11.8<br>342.2[244.6,421.1]            | 421.4 ± 21.6 <sup>**†</sup><br>406.4[312.6,506.2] | 9.6            | <0.001  |
| MMP-3, ng/mL                           | 10.08 ± 0.39<br>8.63[6.39,12.11]  | 9.33 ± 0.42<br>8.65[6.01,12.14]               | 11.47 ± 0.74 <sup>†</sup><br>10.79[7.0,14.5]      | 3.0            | 0.049   |
| MMP-7, ng/mL                           | 1.65 ± 0.08<br>1.29[0.86, 2.10]   | 1.84 ± 0.10<br>1.65[0.97,2.65]                | 2.14 ± 0.18 <sup>*</sup><br>1.2[1.12,2.94]        | 4.2            | 0.016   |
| MMP-8, ng/mL                           | 2.63 ± 0.22<br>1.11[0.61,2.82]    | 3.29 ± 0.32<br>1.52[0.89,3.30]                | 1.79 ± 0.18 <sup>†</sup><br>1.28[0.89,2.19]       | 4.4            | 0.014   |
| MMP-9, ng/mL                           | 95.0 ± 3.8<br>83.1[53.0,123.3]    | 126.7 ± 7.2 <sup>*</sup><br>104.1[71.2,164.9] | 123.8 ± 8.6 <sup>*</sup><br>104.1[73.8,161.0]     | 10.7           | <0.001  |
| TIMP-1, ng/mL                          | 72.2 ± 1.4<br>67.8[54.4,88.2]     | 82.5 ± 2.1 <sup>*</sup><br>82.7[64.8,102.6]   | 90.3 ± 3.4 <sup>*</sup><br>84.6[68.5,107.5]       | 18.5           | <0.001  |
| TIMP-2, ng/mL                          | 78.6 ± 0.9<br>79.0[68.46,88.78]   | 83.6 ± 1.1 <sup>*</sup><br>84.62[75.0,93.3]   | 85.3 ± 1.6 <sup>*</sup><br>85.0[77.8,93.3]        | 8.9            | <0.001  |
| TIMP-3, ng/mL                          | 7.5 ± 0.5<br>4.18[1.95,11.69]     | 9.2 ± 0.8<br>5.81[2.29,11.09]                 | 6.6 ± 0.9<br>3.66[2.16,7.56]                      | 2.8            | 0.063   |
| TIMP-4, ng/mL                          | 1.47 ± 0.04<br>1.33[1.09,1.77]    | 1.46 ± 0.05<br>1.42[1.09,1.89]                | 1.85 ± 0.09 <sup>**†</sup><br>1.75[1.28,2.33]     | 8.9            | <0.001  |
| PINP, ng/mL                            | 37.1 ± 1.3<br>32.8[22.6,47.0]     | 34.5 ± 1.9<br>30.2[21.0,42.7]                 | 39.4 ± 4.0<br>30.9[22.5,45.7]                     | 1.1            | 0.327   |
| PIIINP, ng/mL                          | 7.2 ± 0.1<br>7.12[5.92,8.18]      | 7.6 ± 0.2<br>7.59[6.45,9.31]                  | 9.1 ± 0.4 <sup>**†</sup><br>8.40[6.75,10.67]      | 18.4           | <0.001  |
| CITP, ng/mL                            | 3.01 ± 0.12<br>2.90[2.00,3.86]    | 3.56 ± 0.17<br>3.22[2.04,4.71]                | 3.93 ± 0.42 <sup>*</sup><br>3.10[1.83,5.18]       | 5.0            | 0.007   |
| Cardiotrophin-1, ng/mL10 <sup>-3</sup> | 51.1 ± 6.9<br>12.09[6.59,40.00]   | 43.3 ± 6.8<br>13.98[5.65,40.00]               | 22.8 ± 5.7<br>10.0[02.92,23.92]                   | 2.4            | 0.096   |
| sRAGE, ng/mL                           | 3.46 ± 0.17<br>2.54[1.76,4.18]    | 3.15 ± 0.25<br>2.07[1.50,3.57]                | 2.97 ± 0.27<br>2.25[1.61,3.72]                    | 1.2            | 0.315   |
| Osteopontin, ng/mL                     | 76.2 ± 1.9<br>73.7[58.8,94.6]     | 86.5 ± 4.7 <sup>*</sup><br>79.9[61.6,102.2]   | 92.6 ± 5.5 <sup>*</sup><br>91.9[66.4,118.9]       | 5.1            | 0.007   |
| NT-proBNP, pg/m                        | 87.4 ± 6.4<br>55.6[29.0,111.8]    | 109.4 ± 12.4<br>75.6[33.8,153.1]              | 214.2 ± 33.6 <sup>**†</sup><br>133.1[51.3,302.5]  | 17.7           | <0.001  |
| Sample Size, n                         | 241                               | 144                                           | 61                                                |                |         |

Abbreviations:

The table presents means  $\pm$  standard errors on the first line, and medians  $\pm$  inter quartile range on the second line. ANOVA F-tests and p-values are reported for  $\log_{10}$  biomarker values and post hoc pairwise statistical comparisons were performed.

LVH = patients with left ventricular hypertrophy but no heart failure, DHF = patients with left ventricular hypertrophy and diastolic heart failure, MMP = matrix metalloproteinase, TIMP = tissue inhibitor of MMP, NT-proBNP = n-terminal propeptides of brain natriuretic peptide, sRAGE = soluble receptor for advanced glycation endproduct, PINP = n-terminal collagen I propeptide, PIIINP = n-terminal collagen III propeptide, CITP = collagen I telopeptide.

\* =  $p < 0.05$  compared to Referent Control

† =  $p < 0.05$  compared to LVH

**Table B: Effect size (beta), Wald T statistics, and p-value for adjusted models obtained by setting forward variable selection entry criteria at 0.10.**

|     | Biomarker | Beta   | Wald T-statistic | p-value |
|-----|-----------|--------|------------------|---------|
| LVH | MMP-7     | 0.153  | 3.01             | 0.080   |
|     | MMP-9     | 0.006  | 12.04            | < 0.001 |
|     | TIMP-1    | 0.018  | 13.01            | < 0.001 |
|     | NT-proBNP | 0.002  | 3.37             | 0.070   |
|     | PIIINP    | 0.113  | 4.39             | 0.040   |
|     |           |        |                  |         |
|     |           |        |                  |         |
| DHF | MMP-2     | 0.002  | 3.98             | 0.050   |
|     | MMP-8     | -0.247 | 7.81             | 0.005   |
|     | PIIINP    | 0.150  | 3.50             | 0.002   |
|     | TIMP-4    | 0.818  | 9.43             | 0.060   |

Abbreviations:

LVH = patients with left ventricular hypertrophy, DHF = patients with left ventricular hypertrophy and diastolic heart failure, MMP = matrix metalloproteinase, TIMP = tissue inhibitor of MMP, NT-proBNP = n-terminal propeptides of brain natriuretic peptide, PIIINP = n-terminal collagen III propeptide.

**Table C: Multivariate, Multi-Biomarker Analysis for LVH and DHF Detection****LVH**

| Algorithm   | 1 factor        | 2 factor        | 3 factor        | 4 factor        | 5 factor        | NT-pro BNP      |
|-------------|-----------------|-----------------|-----------------|-----------------|-----------------|-----------------|
| AUC [95%CI] | 0.65[0.60,0.70] | 0.68[0.63,0.73] | 0.69[0.64,0.74] | 0.69[0.64,0.74] | 0.70[0.65,0.75] | 0.57[0.52,0.63] |
| CV AUC      | 0.65[0.60,0.71] | 0.68[0.62,0.74] | 0.69[0.63,0.74] | 0.68[0.62,0.74] | 0.68[0.64,0.76] | 0.58[0.51,0.64] |
| TIMP-1      | X               | X               | X               | X               | X               |                 |
| MMP-9       |                 | X               | X               | X               | X               |                 |
| PIIINP      |                 |                 | X X             | X               | X               |                 |
| NT-proBNP   |                 |                 |                 | X               | X               |                 |
| TIMP-2      |                 |                 |                 |                 | X               |                 |

**DHF**

| Algorithm | 1 factor         | 2 factor         | 3 factor         | 4 factor          | NT-pro BNP       |
|-----------|------------------|------------------|------------------|-------------------|------------------|
| AUC       | 0.68[0.60, 0.76] | 0.70[0.62, 0.78] | 0.76[0.68, 0.82] | 0.77[0.70, 0.84]  | 0.65[0.56, 0.74] |
| CV AUC    | 0.68[0.58, 0.78] | 0.69[0.59, 0.79] | 0.74[0.64, 0.82] | 0.75 [0.67, 0.83] | 0.65[0.54, 0.75] |
| MMP-2     | X                | X                | X                | X                 |                  |
| TIMP-4    |                  | X                | X                | X                 |                  |
| MMP-8     |                  |                  | X                | X                 |                  |
| PIIINP    |                  |                  |                  | X                 |                  |

## Abbreviations:

LVH = patients with left ventricular hypertrophy, DHF = patients with left ventricular hypertrophy and diastolic heart failure, MMP = matrix metalloproteinase, TIMP = tissue inhibitor of MMP, NT-proBNP = n-terminal propeptides of brain natriuretic peptide, PIIINP = n-terminal collagen III propeptide, AUC = area under the curve (with 95% confidence intervals), CV = cross validated

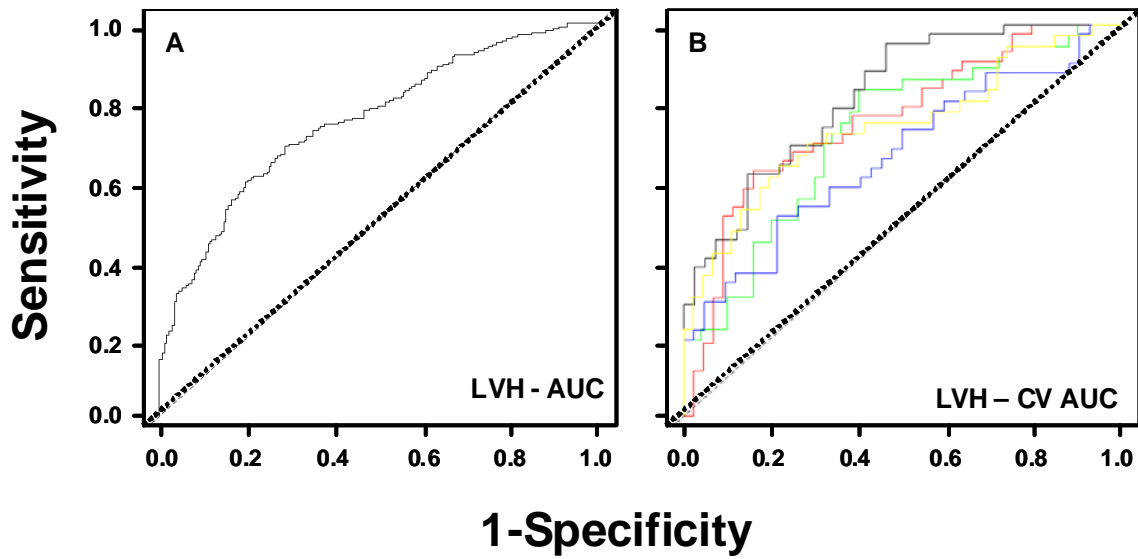

### Supplement Figure A

#### Figure Legend for Supplemental Figure A:

**Panel A:** Receiver operator curve analysis for plasma NT-proBNP in left ventricular hypertrophy (LVH). Observed area under the curve (AUC) for LVH using clinical covariates plus NT-proBNP = 0.75 [0.71, 0.80].

**Panel B:** Cross-validated analysis for NT-proBNP in LVH. The ROC curves generated from a 30 random simulated simulations of a 5-fold split of the data are presented. The cross validated ROC curves are similar in shape to those obtained in Panel A.

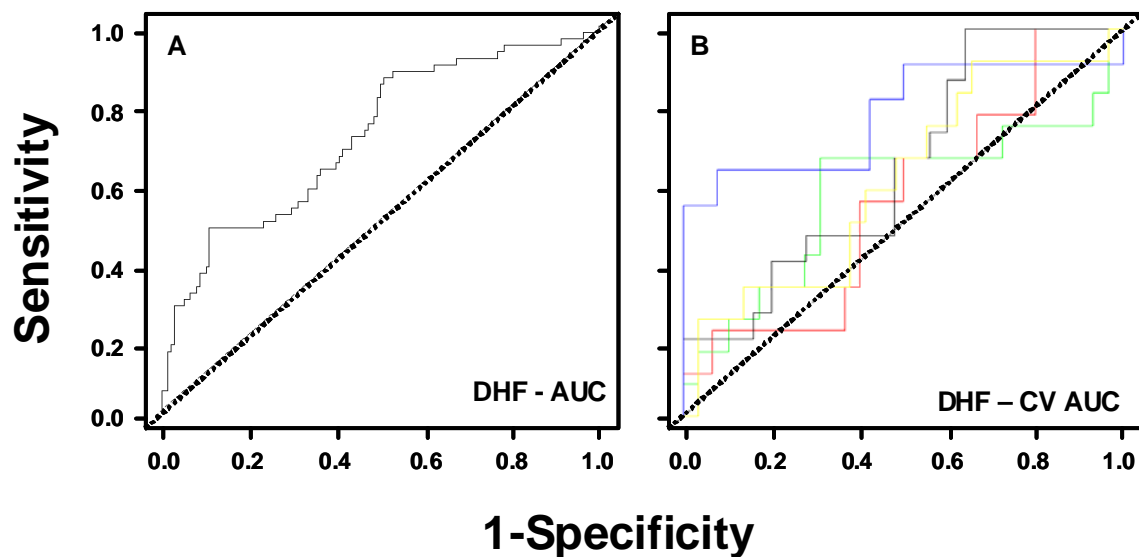

**Supplement Figure B**

**Figure Legend for Supplemental Figure B:**

**Panel A:** Receiver operator curve analysis for NT-proBNP in diastolic heart failure (DHF). Observed area under the curve (AUC) for DHF using clinical covariates plus NT-proBNP = 0.71 [0.63, 0.79].

**Panel B:** The ROC curves generated from 30 random simulated simulations of a 5-fold split of the data are presented. The cross-validated ROC curves are similar in shape to those obtained in Panel A.
